# Supplementary material for: Bioremediation of soils saturated with spilled crude oil
Source: PubMed Central journal article supplement (PMC6981149; doi:10.1038/s41598-019-57224-x), 2020-01-24
Supplement: 41598_2019_57224_MOESM1_ESM.pdf [file 41598_2019_57224_MOESM1_ESM.pdf]

# **Bioremediation of soils saturated with spilled crude oil**

Nedaa Ali<sup>1</sup>, Narjes Dashti<sup>1</sup>, Majida Khanafer<sup>1</sup>, Husain Al-Awadhi<sup>1</sup> & Samir Radwan<sup>2</sup>

<sup>1</sup>Microbiology program, Department of Biological Sciences, Faculty of Science, Kuwait University, P.O.Box 5969, Safat 13060, Kuwait. <sup>2</sup>Permanent address: Von Einem Str. 25, 48159 Münster, Germany. Correspondence and requests for materials should be addressed to S. R. (email: samir.radwan@ku.edu.kw) and H.A. (email: husain.alawadhi@ku.edu.kw)

**Table S1.**

Minor hydrocarbonoclastic bacteria in oil-saturated soil (OSS) and OSS diluted (with pristine desert soil: I, 1 kg OSS + 0.25 kg; II, 1 kg OSS + 0.5 kg; III, 1 kg OSS + 0.75 kg) during bioremediation (shaded areas in Pie charts in Fig. 1 and 2).

| End of month | Oil-saturated soil (OSS)         | Diluted with pristine desert soil                                                                    |                                  |                                 | Diluted with pristine garden soil |                                  |                                  |
|--------------|----------------------------------|------------------------------------------------------------------------------------------------------|----------------------------------|---------------------------------|-----------------------------------|----------------------------------|----------------------------------|
|              |                                  | I                                                                                                    | II                               | III                             | I                                 | II                               | III                              |
| 0 March      | <i>Dietzia maris</i>             | <i>Cellulomonas iranensis</i>                                                                        | <i>Pseudomonas songnenensis</i>  |                                 | <i>Pseudomonas songnenensis</i>   | <i>Lentzea chajnantorensis</i>   |                                  |
|              | <i>Streptomyces gulbargensis</i> | <i>Pseudomonas songnenensis</i>                                                                      | <i>Streptomyces griseoflavus</i> |                                 |                                   | <i>Microbacterium paludicola</i> |                                  |
|              | <i>Williamsia marianensis</i>    | <i>Rhodococcus gordoniae</i>                                                                         | <i>Williamsia marianensis</i>    |                                 |                                   | <i>Rhodococcus erythropolis</i>  |                                  |
|              | <i>Nocardioides albus</i>        | <i>Streptomyces griseoflavus</i><br><i>Streptomyces scopiformis</i><br><i>Williamsia marianensis</i> | <i>Actinotalea ferrariae</i>     |                                 |                                   |                                  |                                  |
| 1 April      | <i>Agromyces iriomotensis</i>    | <i>Gordonia hankookensis</i>                                                                         | <i>Streptomyces maoxianensis</i> | <i>Pseudomonas knackmussii</i>  | <i>Arthrobacter agilis</i>        | <i>Kocuria turfanensis</i>       | <i>Arthrobacter echini</i>       |
|              | <i>Bacillus circulans</i>        | <i>Pseudarthrobacter phenanthrenivorans</i>                                                          | <i>Streptomyces maoxianensis</i> | <i>Pseudomonas songnenensis</i> | <i>Arthrobacter ginsengisoli</i>  |                                  | <i>Arthrobacter ginsengisoli</i> |
|              | <i>Gordonia hankookensis</i>     | <i>Streptomyces youssoufiensis</i>                                                                   | <i>Streptomyces maoxianensis</i> | <i>Williamsia marianensis</i>   |                                   |                                  | <i>Dietzia maris</i>             |
|              | <i>Pseudomonas songnenensis</i>  | <i>Streptomyces indoligenes</i>                                                                      |                                  |                                 |                                   |                                  | <i>Dietzia papillomatosis</i>    |
|              | <i>Streptomyces alboflavus</i>   |                                                                                                      |                                  |                                 |                                   |                                  | <i>Kocuria turfanensis</i>       |

2 May

*Acinetobacter  
radioresistens*

*Dietzia maris*

*Nocardioides  
solisilvae*

*Kocuria  
dechangensis*

*Cellulosimicrobium  
funkei*

*Streptomyces  
neyagawaensis*

*Kocuria  
himachalensis*

*Planococcus  
rifietoensis*

*Pseudomonas  
songnenensis*

*Rhodococcus  
gordoniae*

*Williamsia  
marianensis*

3 June

*Skermanella  
aerolata*

*Dietzia maris*

*Agrococcus baldri*

*Agrococcus baldri*

*Rhodococcus  
gordoniae*

*Cellulomonas  
iranensis*

*Agrococcus citreus*

*Agrococcus citreus*

*Cellulomonas  
iranensis*

*Microbacterium  
paludicola*

*Cellulomonas  
bogoriensis*

*Nocardioides deserti*

*Cellulomonas  
hominis*

*Modestobacter  
versicolor*

*Skermanella rosea*

*Cellulomonas  
cellasea*

|             |                                  |                                  |                                      |                                  |                                  |                                      |                                |
|-------------|----------------------------------|----------------------------------|--------------------------------------|----------------------------------|----------------------------------|--------------------------------------|--------------------------------|
| 4 July      | <i>Aeromicrobium erythreum</i>   | <i>Microbacterium oryzae</i>     | <i>Kocuria flava</i>                 | <i>Dietzia cinnamea</i>          |                                  | <i>Cellulomonas iranensis</i>        | <i>Williamsia marianensis</i>  |
|             | <i>Agrococcus citreus</i>        | <i>Microbacterium paludicola</i> | <i>Ornithinimicrobium humiphilum</i> | <i>Micrococcus aloeverae</i>     |                                  | <i>Kocuria dechangensis</i>          | <i>Nocardioides zeae</i>       |
|             | <i>Cellulomonas flavigena</i>    | <i>Pseudomonas balearica</i>     | <i>Noviherbaspirillum agri</i>       | <i>Modestobacter versicolor</i>  |                                  | <i>Kocuria himachalensis</i>         |                                |
|             | <i>Exiguobacterium arabatum</i>  | <i>Pseudomonas luteola</i>       |                                      | <i>Pseudomonas songnenensis</i>  |                                  | <i>Krasilnikoviella muralis</i>      |                                |
|             | <i>Kocuria flava</i>             |                                  |                                      | <i>Rhodococcus gordoniae</i>     |                                  | <i>Nocardioides flavus</i>           |                                |
| 5 August    | <i>Blastococcus saxobsidens</i>  |                                  | <i>Xylanimicrobium pachnodae</i>     | <i>Cellulomonas iranensis</i>    | <i>Xylanimicrobium pachnodae</i> | <i>Bacillus koreensis</i>            | <i>Blastococcus aggregatus</i> |
|             | <i>Pseudomonas balearica</i>     |                                  | <i>Rhodocista pekingensis</i>        | <i>Microbacterium oryzae</i>     |                                  | <i>Kocuria flava</i>                 | <i>Kocuria polaris</i>         |
|             |                                  |                                  |                                      | <i>Nocardioides deserti</i>      |                                  | <i>Micrococcus endophyticus</i>      | <i>Nocardioides deserti</i>    |
|             |                                  |                                  |                                      | <i>Nocardioides solisilvae</i>   |                                  | <i>Skermanella stibiïresistens</i>   | <i>Rhodocista pekingensis</i>  |
|             |                                  |                                  |                                      |                                  |                                  | <i>Ornithinimicrobium humiphilum</i> |                                |
| 6 September | <i>Kocuria flava</i>             |                                  |                                      | <i>Microbacterium aureliae</i>   | <i>Agrococcus baldri</i>         | <i>Cellulomonas iranensis</i>        |                                |
|             | <i>Microbacterium lacusdiani</i> |                                  |                                      | <i>Microbacterium paludicola</i> | <i>Blastococcus aggregatus</i>   | <i>Geodermatophilus taihuensis</i>   |                                |
|             | <i>Cellulomonas hominis</i>      |                                  |                                      | <i>Nocardioides flavus</i>       | <i>Blastococcus colisei</i>      | <i>Kocuria polaris</i>               |                                |
|             | <i>Cellulomonas massiliensis</i> |                                  |                                      |                                  | <i>Kocuria turfanensis</i>       | <i>Nocardioides sediminis</i>        |                                |

*Microbacterium  
petrolearium*

*Planococcus  
donghaensis*

*Planomicrobium  
glaciei*

---

**Table S2.**

Sequencing of 16S rRNA-gene of hydrocarbonoclastic bacteria isolated from oil-saturated desert soil (OSS) and OSS diluted with pristine desert and garden soils.

| Isolate designation | Total bases | Nearest Gene Bank match (accession no.)                 | Similarity % | Bases compared | Accession No. |
|---------------------|-------------|---------------------------------------------------------|--------------|----------------|---------------|
| HSC-3               | 498         | <i>Streptomyces gulbargensis</i> (FN598542)             | 100          | 498/498        | MK161114      |
| HSC-4               | 532         | <i>Pseudomonas songnenensis</i> (NR_148295)             | 100          | 532/532        | MK161115      |
| HSC-5               | 496         | <i>Pseudomonas balearica</i> (NR_025972)                | 99           | 502/505        | MK161116      |
| HSC-20              | 533         | <i>Agromyces iriomotensis</i> (NR_133690)               | 99           | 541/545        | MK161117      |
| HSC-23              | 491         | <i>Bacillus circulans</i> (NR_118445)                   | 99           | 497/500        | MK161118      |
| HSC-28              | 520         | <i>Georgenia daeguensis</i> (NR_117960)                 | 99           | 524/526        | MK161119      |
| HSC-30              | 477         | <i>Acinetobacter radioresistens</i> (NR_114074)         | 99           | 483/486        | MK161120      |
| HSC-35              | 502         | <i>Citricoccus yambaruensis</i> (NR_132666)             | 99           | 512/517        | MK161121      |
| HSC-45              | 516         | <i>Skermanella aerolata</i> (NR_043929)                 | 99           | 526/531        | MK161122      |
| HSC-48              | 517         | <i>Exiguobacterium arabatum</i> (FM203124)              | 99           | 529/535        | MK161123      |
| HSC-56              | 510         | <i>Xylanimicrobium pachnodae</i> (NR_024956)            | 99           | 522/528        | MK161124      |
| HSC-61              | 504         | <i>Aeromicrobium erythreum</i> (NR_024846)              | 99           | 510/513        | MK161125      |
| HSC-75              | 515         | <i>Blastococcus saxobsidens</i> (NR_117019)             | 99           | 517/518        | MK161126      |
| HSC-81              | 526         | <i>Georgenia soli</i> (NR_116959)                       | 99           | 530/532        | MK161127      |
| HSC-87              | 507         | <i>Cellulomonas massiliensis</i> (NR_125601)            | 99           | 513/516        | MK161128      |
| HSC-506             | 516         | <i>Streptomyces alboflavus</i> (NR_044151)              | 100          | 516/516        | MK161129      |
| HSC-511             | 518         | <i>Micromonospora soli</i> (NR_146360)                  | 99           | 520/521        | MK161130      |
| HSC-515             | 515         | <i>Cellulomonas hominis</i> (NR_029288)                 | 100          | 515/515        | MK161131      |
| DSA-89              | 509         | <i>Streptomyces scopiformis</i> (NR_114403)             | 99           | 519/524        | MK161132      |
| DSA-98              | 513         | <i>Pseudarthrobacter phenanthrenivorans</i> (NR_074770) | 99           | 519/522        | MK161133      |
| DSA-100             | 513         | <i>Nocardioides solisilvae</i> (NR_136850)              | 99           | 515/516        | MK161134      |
| DSA-102             | 501         | <i>Nocardioides deserti</i> (KY436429)                  | 99           | 503/504        | MK161135      |
| DSA-104             | 509         | <i>Gordonia hankookensis</i> (NR_104507)                | 99           | 513/515        | MK161136      |
| DSA-105             | 477         | <i>Streptomyces youssoufiensis</i> (NR_116980)          | 98           | 495/505        | MK161137      |
| DSA-111             | 414         | <i>Nocardioides aquiterrae</i> (NR_025261)              | 99           | 416/417        | MK161138      |
| DSA-114             | 509         | <i>Arthrobacter subterraneus</i> (KY436432)             | 99           | 513/515        | MK161139      |
| DSA-118             | 504         | <i>Aeromicrobium massiliense</i> (NR_125588)            | 99           | 510/513        | MK161140      |
| DSA-124             | 504         | <i>Gordonia amicalis</i> (NR_028735)                    | 99           | 516/522        | MK161141      |
| DSA-134             | 525         | <i>Pseudomonas luteola</i> (NR_114215)                  | 99           | 539/546        | MK161142      |
| DSA-146             | 517         | <i>Kocuria flava</i> (NR_044308)                        | 100          | 517/517        | MK161143      |
| DSA-155             | 499         | <i>Cellulomonas iranensis</i> (NR_024914)               | 99           | 503/505        | MK161144      |
| DSA-162             | 495         | <i>Micrococcus flavus</i> (NR_043881)                   | 99           | 497/498        | MK161145      |
| DSA-516             | 507         | <i>Streptomyces indoligenes</i> (NR_149274)             | 99           | 515/519        | MK161146      |
| DSA-517             | 514         | <i>Pseudonocardia halophobica</i> (NR_116193)           | 99           | 520/523        | MK161147      |
| DSB-163             | 506         | <i>Streptomyces alfalfae</i> (NR_147713)                | 99           | 510/512        | MK161148      |
| DSB-165             | 503         | <i>Kocuria dechangensis</i> (NR_137239)                 | 99           | 511/515        | MK161149      |
| DSB-166             | 501         | <i>Blastococcus aggregatus</i> (NR_114864)              | 100          | 501/501        | MK161150      |
| DSB-169             | 501         | <i>Arthrobacter tumbae</i> (NR_042078)                  | 100          | 501/501        | MK161151      |

|         |     |                                                    |     |         |          |
|---------|-----|----------------------------------------------------|-----|---------|----------|
| DSB-170 | 494 | <i>Streptomyces griseoflavus</i> (KU720585)        | 100 | 494/494 | MK161152 |
| DSB-173 | 495 | <i>Arthrobacter echini</i> (NR_148833)             | 99  | 503/507 | MK161153 |
| DSB-181 | 484 | <i>Williamsia marianensis</i> (NR_118613)          | 99  | 486/487 | MK161154 |
| DSB-182 | 496 | <i>Kocuria himachalensis</i> (LC113906)            | 99  | 499/501 | MK161155 |
| DSB-183 | 474 | <i>Planococcus rifietoensis</i> (MF417406)         | 98  | 491/500 | MK161156 |
| DSB-192 | 502 | <i>Dietzia maris</i> (NR_118596)                   | 100 | 502/502 | MK161157 |
| DSB-196 | 515 | <i>Kocuria polaris</i> (KX959605)                  | 100 | 515/515 | MK161158 |
| DSB-197 | 504 | <i>Roseomonas oryzae</i> (NR_137403)               | 99  | 506/507 | MK161159 |
| DSB-202 | 512 | <i>Dietzia papillomatosis</i> (NR_116687)          | 100 | 512/512 | MK161160 |
| DSB-209 | 444 | <i>Azospirillum rugosum</i> (NR_042582)            | 99  | 450/453 | MK161161 |
| DSB-525 | 511 | <i>Actinotalea ferrariae</i> (NR_118034)           | 99  | 517/520 | MK161162 |
| DSB-529 | 516 | <i>Streptomyces maoxianensis</i> (NR_148303)       | 99  | 518/519 | MK161163 |
| DSB-533 | 489 | <i>Noviherbaspirillum agri</i> (KX129821)          | 97  | 521/537 | MK161164 |
| DSC-229 | 520 | <i>Arthrobacter phenanthrenivorans</i> (NR_042469) | 99  | 524/526 | MK161165 |
| DSC-235 | 430 | <i>Pseudomonas knackmussii</i> (NR_117756)         | 99  | 436/439 | MK161166 |
| DSC-236 | 495 | <i>Microbacterium aerolatum</i> (NR_028944)        | 99  | 499/501 | MK161167 |
| DSC-238 | 525 | <i>Georgenia satyanarayanai</i> (NR_117051)        | 99  | 527/528 | MK161168 |
| DSC-243 | 493 | <i>Dietzia cinnamea</i> (NR_116686)                | 100 | 493/493 | MK161169 |
| DSC-244 | 521 | <i>Cellulosimicrobium funkei</i> (NR_042937)       | 99  | 527/530 | MK161170 |
| DSC-249 | 525 | <i>Arthrobacter ginsengisoli</i> (KF212463)        | 99  | 527/528 | MK161171 |
| DSC-254 | 530 | <i>Agrococcus citreus</i> (NR_041542)              | 99  | 534/536 | MK161172 |
| DSC-261 | 525 | <i>Micrococcus endophyticus</i> (KY933306)         | 99  | 527/528 | MK161173 |
| DSC-267 | 529 | <i>Micrococcus aloeverae</i> (NR_134088)           | 99  | 531/532 | MK161174 |
| DSC-268 | 518 | <i>Modestobacter versicolor</i> (NR_042368)        | 100 | 518/518 | MK161175 |
| DSC-279 | 523 | <i>Krasilnikoviella muralis</i> (LC148843)         | 99  | 531/535 | MK161176 |
| DSC-284 | 524 | <i>Microbacterium oryzae</i> (NR_117527)           | 99  | 530/533 | MK161177 |
| DSC-290 | 520 | <i>Microbacterium aureliae</i> (NR_152652)         | 99  | 524/526 | MK161178 |
| DSC-543 | 513 | <i>Alkanindiges hongkongensis</i> (NR_115179) )    | 99  | 525/531 | MK161179 |
| DSC-544 | 509 | <i>Cellulomonas cellasea</i> (NR_037077)           | 99  | 511/512 | MK161180 |
| DSC-556 | 496 | <i>Nocardioides flavus</i> (AF005014)              | 98  | 514/523 | MK161181 |
| GSA-299 | 511 | <i>Micrococcus cohnii</i> (NR_117194)              | 99  | 519/523 | MK161182 |
| GSA-300 | 521 | <i>Streptomyces yangpuensis</i> (NR_148776)        | 99  | 523/524 | MK161183 |
| GSA-304 | 493 | <i>Arthrobacter agilis</i> (NR_026198)             | 99  | 515/526 | MK161184 |
| GSA-309 | 427 | <i>Cellulomonas flavigena</i> (NR_074490)          | 98  | 443/451 | MK161185 |
| GSA-316 | 523 | <i>Microbacterium lacusdiani</i> (KP986565)        | 99  | 529/523 | MK161186 |
| GSA-328 | 526 | <i>Agrococcus baldri</i> (NR_041543)               | 99  | 532/535 | MK161187 |
| GSA-329 | 400 | <i>Cellulomonas bogoriensis</i> (NR_114941)        | 99  | 412/418 | MK161188 |
| GSA-337 | 507 | <i>Skermanella rosea</i> (NR_152076)               | 100 | 507/507 | MK161189 |
| GSA-356 | 508 | <i>Rothia endophytica</i> (NR_109752)              | 99  | 516/520 | MK161190 |
| GSA-362 | 516 | <i>Planomicrobium glaciei</i> (NR_044384)          | 99  | 520/522 | MK161191 |
| GSA-366 | 507 | <i>Microbacterium petrolearium</i> (NR_134087)     | 99  | 513/516 | MK161192 |
| GSA-368 | 509 | <i>Georgenia sediminis</i> (NR_109690)             | 98  | 529/539 | MK161193 |
| GSA-369 | 411 | <i>Xylanimonas cellulositytica</i> (NR_074544)     | 99  | 421/426 | MK161194 |
| GSA-370 | 520 | <i>Planococcus donghaensis</i> (NR_044073)         | 99  | 524/526 | MK161195 |
| GSA-372 | 443 | <i>Blastococcus colisei</i> (NR_149176)            | 99  | 455/461 | MK161196 |

|         |     |                                                      |     |         |          |
|---------|-----|------------------------------------------------------|-----|---------|----------|
| GSB-381 | 508 | <i>Stenotrophomonas rhizophila</i> (NR_121739)       | 97  | 536/550 | MK161197 |
| GSB-382 | 525 | <i>Lentzea chajnantorensis</i> (NR_149214)           | 99  | 527/528 | MK161198 |
| GSB-383 | 514 | <i>Rhodococcus erythropolis</i> (KJ476725)           | 99  | 520/523 | MK161199 |
| GSB-395 | 523 | <i>Streptomyces neyagawaensis</i> (NR_025868)        | 66  | 525/526 | MK161200 |
| GSB-409 | 530 | <i>Kocuria turfanensis</i> (NR_043899)               | 99  | 534/536 | MK161201 |
| GSB-422 | 450 | <i>Skermanella stibiirensis</i> (NR_117972)          | 96  | 486/504 | MK161202 |
| GSB-424 | 542 | <i>Bacillus persicus</i> (KY436466)                  | 99  | 546/548 | MK161203 |
| GSB-425 | 523 | <i>Microbacterium paludicola</i> (NR_114939)         | 99  | 525/526 | MK161204 |
| GSB-431 | 499 | <i>Geodermatophilus taihuensis</i> (NR_109679)       | 98  | 523/535 | MK161205 |
| GSB-433 | 514 | <i>Nocardioides sediminis</i> (NR_044228)            | 99  | 530/538 | MK161206 |
| GSB-588 | 510 | <i>Cellulosimicrobium marinum</i> (NR_146662)        | 99  | 512/513 | MK161207 |
| GSB-590 | 511 | <i>Pseudonocardia kongjuensis</i> (NR_025384)        | 100 | 511/511 | MK161208 |
| GSC-439 | 515 | <i>Nocardia fluminea</i> (NR_117325)                 | 100 | 515/515 | MK161209 |
| GSC-441 | 522 | <i>Arthrobacter bambusae</i> (NR_133968)             | 99  | 426/528 | MK161210 |
| GSC-443 | 525 | <i>Streptomyces fulvissimus</i> (KY820858)           | 99  | 527/528 | MK161211 |
| GSC-444 | 501 | <i>Aeromicrobium ginsengisoli</i> (NR_041384)        | 98  | 517/525 | MK161212 |
| GSC-464 | 392 | <i>Arthrobacter aurescens</i> (KJ476726)             | 99  | 394/395 | MK161213 |
| GSC-468 | 508 | <i>Rhodococcus gordoniae</i> (AB915625)              | 99  | 518/523 | MK161214 |
| GSC-469 | 458 | <i>Microbacterium ginsengiterrae</i> (NR_116483)     | 99  | 460/461 | MK161215 |
| GSC-490 | 480 | <i>Rhodocista pekingensis</i> strain 3-p (NR_028855) | 98  | 500/510 | MK161216 |
| GSC-492 | 506 | <i>Nocardioides albus</i> (KY436468)                 | 99  | 514/518 | MK161217 |
| GSC-500 | 547 | <i>Moraxella osloensis</i> (KT989843)                | 100 | 547/547 | MK161218 |
| GSC-603 | 515 | <i>Ornithinimicrobium humiphilum</i> (KT989854)      | 99  | 525/530 | MK161219 |
| GSC-606 | 489 | <i>Nocardioides zeae</i> (NR_134102)                 | 98  | 509/519 | MK161220 |



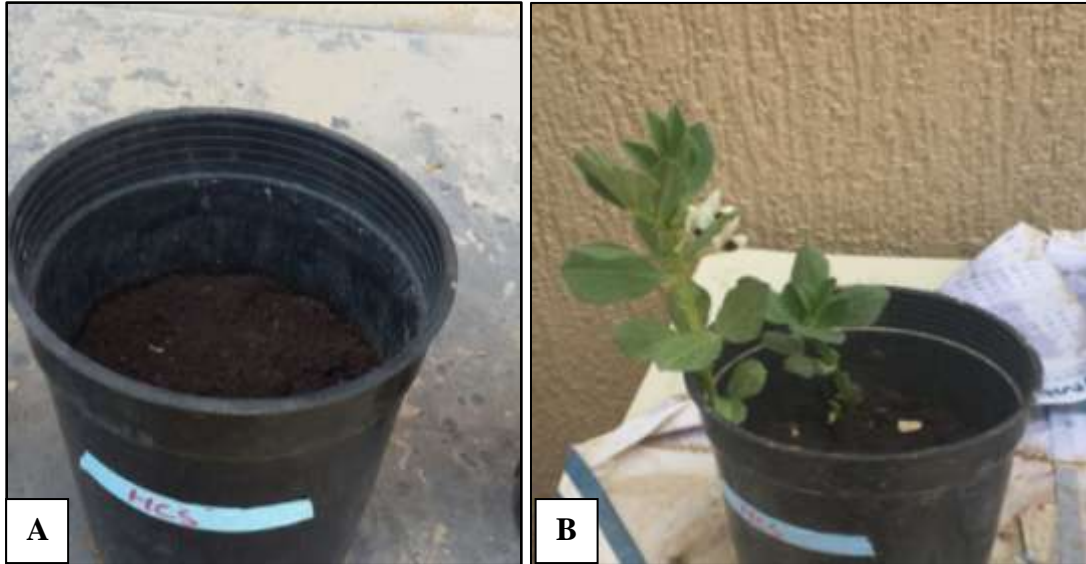

**Fig. S1** Suitability of oil-saturated soil for cropping of broad beans..

A, Unbioremediated; B, 6-months bioremediated soil.
